# Supplementary material
Source: publisher site journal article supplement (https://www.dovepress.com/article/380641)
Supplement: Supplementary file 1 [file get_supplementary_file.php]

## Supplementary Material

### Survey on social representations of cancer in Medellín, Colombia.

The data collected in this form will be used to study what people think and do when faced with a disease such as cancer. The data will be used exclusively for research purposes. The information requested is confidential and in no case will your identity be requested. The results will be published through statistical aggregates hiding the identity of all individuals. **Do you agree to voluntarily participate in this research?** YES \_\_\_\_\_ NO \_\_\_\_\_

If you accept, please honestly answer the following questions.

|                                                                                                                                                                                                                                                                                                                        |                                                                                                                                                                                                                                                                                |
|------------------------------------------------------------------------------------------------------------------------------------------------------------------------------------------------------------------------------------------------------------------------------------------------------------------------|--------------------------------------------------------------------------------------------------------------------------------------------------------------------------------------------------------------------------------------------------------------------------------|
| <b>1. Code</b> _____                                                                                                                                                                                                                                                                                                   | <b>2. In which neighborhood do you live?</b> _____                                                                                                                                                                                                                             |
| <b>3. Age:</b> _____ (years old).                                                                                                                                                                                                                                                                                      | <b>Sex:</b> Female <input type="checkbox"/> Male <input type="checkbox"/>                                                                                                                                                                                                      |
| <b>5. What is the social stratum of your household?</b> _____                                                                                                                                                                                                                                                          | <b>6. Do you consider yourself poor?</b> Yes <input type="checkbox"/> No <input type="checkbox"/>                                                                                                                                                                              |
| <b>9. What is your highest education level?</b><br><br><input type="checkbox"/> I did not attend school <input type="checkbox"/> Technical-Technological<br><br><input type="checkbox"/> Primary <input type="checkbox"/> University<br><br><input type="checkbox"/> High School <input type="checkbox"/> Postgraduate | <b>9. What is your occupation?</b><br><br><input type="checkbox"/> Unemployed <input type="checkbox"/> Student<br><br><input type="checkbox"/> Care for the home <input type="checkbox"/> Worker<br><br><input type="checkbox"/> Retired <input type="checkbox"/> Other? _____ |
| <b>9. Have you studied any health-related course?</b> (e.g., nursing, bacteriology, and medicine)<br><br>Yes <input type="checkbox"/> No <input type="checkbox"/>                                                                                                                                                      | <b>10. What is your monthly income?</b><br><br>\$ _____                                                                                                                                                                                                                        |
| <b>11. How would you rate your financial situation?</b>                                                                                                                                                                                                                                                                | <b>12. Have you read any self-help books?</b>                                                                                                                                                                                                                                  |

|                                                                                                                                                                                                                                                          |                                                                                                                             |
|----------------------------------------------------------------------------------------------------------------------------------------------------------------------------------------------------------------------------------------------------------|-----------------------------------------------------------------------------------------------------------------------------|
| <input type="checkbox"/> Excellent <input type="checkbox"/> Good <input type="checkbox"/> Average <input type="checkbox"/> Bad                                                                                                                           | Yes <input type="checkbox"/> No <input type="checkbox"/>                                                                    |
| <b>14. Have you ever been diagnosed with cancer?</b> Yes <input type="checkbox"/><br>No <input type="checkbox"/>                                                                                                                                         | <b>15. Is anyone close to you is or was diagnosed with cancer?</b> Yes <input type="checkbox"/> No <input type="checkbox"/> |
| <b>16. (Only for those who answered yes to Question 15) Today, that person:</b><br><br><input type="checkbox"/> Is cured <input type="checkbox"/> Is in treatment <input type="checkbox"/> Died of cancer <input type="checkbox"/> Died of another cause |                                                                                                                             |

Now, we will talk about the possible **causes of cancer**. I am going to mention some factors and, for each one, please indicate if you think they can promote the development of cancer by checking:

**1. No risk, 2. Low risk 3. Moderate risk, 4. High risk**

|                                                                                                             | 1 | 2 | 3 | 4 |
|-------------------------------------------------------------------------------------------------------------|---|---|---|---|
| Holding anger, resentment, and hatred toward others                                                         |   |   |   |   |
| Going through painful experiences, such as grieving the death of a loved one, a separation, or unemployment |   |   |   |   |
| Dealing with personal or professional disappointments                                                       |   |   |   |   |
| Not being able to adequately express emotions                                                               |   |   |   |   |

I will now mention a few **general opinions about cancer**. For each one, please indicate if you agree or disagree by checking:

**1. Completely Agree, 2. Agree, 3. Disagree, 4. Completely Disagree**

|  | 1 | 2 | 3 | 4 |
|--|---|---|---|---|
|  |   |   |   |   |

|                                                             |  |  |  |  |
|-------------------------------------------------------------|--|--|--|--|
| Cancer is an opportunity to change bad habits and behaviors |  |  |  |  |
| Cancer is a test from God                                   |  |  |  |  |
| Cancer is a battle that the best warriors win               |  |  |  |  |
| Cancer is a lesson for those who suffer from it             |  |  |  |  |
| Cancer is an opportunity to become a better person          |  |  |  |  |

Now, I will mention some practices that are used as **cancer treatments**. I am going to mention some of them and for each one, please indicate if you think they can be useful in treating the disease by checking:

**1. No effect, 2. Low effect, 3. Moderate effect, 4. High effect**

|                                                                                   | <b>1</b> | <b>2</b> | <b>3</b> | <b>4</b> |
|-----------------------------------------------------------------------------------|----------|----------|----------|----------|
| Expressing emotions better (e.g., Not keeping quiet and expressing what you feel) |          |          |          |          |
| Mind reprogramming                                                                |          |          |          |          |
| Positive thoughts and attitude                                                    |          |          |          |          |
| Forgiving those who hurt you (e.g., letting go of resentment and anger)           |          |          |          |          |
| Facing illness with a fighting spirit                                             |          |          |          |          |
| Avoiding negative feelings and seeking happiness                                  |          |          |          |          |
